# Supplementary material for: Human milk oligosaccharides and milk fat globule membrane reduce allergic reactions in mice through the modulation of gut microbiota and metabolic functions
Source: Royal Society of Chemistry journal article supplement (doi:10.1039/d4fo03851g), 2024-01-01
Supplement: d4fo03851g1.pdf [file d4fo03851g1.pdf]

Table S1 Anaphylactic symptom scoring

| Score | Clinical symptom                                                                     |
|-------|--------------------------------------------------------------------------------------|
| 0     | No symptoms                                                                          |
| 1     | Scratching and rubbing nose and mouth frequently                                     |
| 2     | Puffiness around the eyes and mouth, increased breathing rate, reduced activity      |
| 3     | Wheezing and labored respiration, rash around mouth and tail, diarrhea               |
| 4     | No activity after stimulation with loss of consciousness, trembling, and convulsions |
| 5     | Shock or death                                                                       |

Table S2 Primers of qRT-PCR

| Primer name    | Forward (5'-3')               | Reverse (5'-3')         |
|----------------|-------------------------------|-------------------------|
| Occludin       | AACCCGAAACTGATGCTGTGGATG<br>A | CGCCCTTGAATGTATGTGGAGA  |
| ZO-1           | TTGGCTACGGAGGTGGCTATG G       | CCTTTGGCTGCTCTTGGGTCTG  |
| Claudin1       | GCTGGGTTTCATCCT GGCTTCTC      | CCTGAGCGGTCACGATGTTGT C |
| $\beta$ -actin | GGTTGTCTCCTGCGACTTCA          | TGGTCCAGGGTTTCTTACTCC   |

Table S3 Primer sequences used in reverse-transcription quantitative PCR assays

| Gene           | Forward (5'–3')                      | Reverse (5'–3')                     |
|----------------|--------------------------------------|-------------------------------------|
| Foxp3          | <b>F:</b> TTACTCGCATGTTTCGCCTACTTCAG | <b>R:</b> CTCGCTCTCCACTCGCACAAAG    |
| ROR $\gamma$ t | <b>F:</b> ACAGCCACTGCATTCCCAGTTT     | <b>R:</b> TCTCGGAAGGACTTGCAGACAT    |
| T-bet          | <b>F:</b> ATCACTAAGCAAGGACGGCGAATG   | <b>R:</b> ACCAAGACCACATCCACAAACATCC |
| GATA-3         | <b>F:</b> TCTGGAGGAGGAACGCTAATGGG    | <b>R:</b> CGGGTCTGGATGCCTTCTTTCTTC  |
| GADPH          | <b>F:</b> GACAGCCGCATCTTCTTG TG      | <b>R:</b> AATCCGTTACACCCGACCTT      |
